# Supplementary material
Source: PubMed Central journal article supplement (PMC1472418)
Supplement: pnas_0507492103_2.pdf [file pnas_0507492103_2.pdf]

**Table 2. Main-effect quantitative resistance loci (QRL) affecting lesion length caused by six Philippine *Xanthomonas oryzae* pv. *oryzae* (*Xoo*) races detected in 292 Lemont/Teqing recombinant inbred lines**

| QRL           | Ch | Marker interval | Para.  | Race 1       | Race 2       | Race 3       | Race 4       | Race 5       | Race 6       |
|---------------|----|-----------------|--------|--------------|--------------|--------------|--------------|--------------|--------------|
| <i>QBbr1a</i> | 1  | RM84 – OSR2     | LOD    |              | 4.56         |              |              |              | 5.20         |
|               |    |                 | Effect |              | -0.80        |              | <b>-0.53</b> |              | -1.60        |
| <i>QBbr1b</i> | 1  | RM23 – RD1.5    | LOD    |              | 6.06         |              |              | 2.17         | 2.46         |
|               |    |                 | Effect |              | 1.00         |              |              | 0.89         | 1.00         |
| <i>QBbr1d</i> | 1  | OSR3 – RM104    | LOD    |              | 5.43         | 2.61         | 2.14         |              |              |
|               |    |                 | Effect |              | -0.88        | -0.67        | -0.85        |              |              |
| <i>QBbr2a</i> | 2  | RM211 – RM279   | LOD    |              |              | 3.70         |              |              |              |
|               |    |                 | Effect | <b>1.26</b>  |              | 0.88         |              | <b>-0.66</b> |              |
| <i>QBbr2b</i> | 2  | RM27 – RM324    | LOD    | 4.95         | 4.38         | 3.18         | 4.50         | 4.56         | 3.50         |
|               |    |                 | Effect | -1.39        | -0.78        | -0.80        | -1.15        | -1.61        | -1.15        |
| <i>QBbr3b</i> | 3  | RM282 – RD3.1   | LOD    |              |              |              |              | 3.66         |              |
|               |    |                 | Effect |              |              |              | <b>-0.52</b> | -1.21        | <b>-0.67</b> |
| <i>QBbr3c</i> | 3  | RM16 – RZ403    | LOD    |              |              |              |              |              | 3.00         |
|               |    |                 | Effect | <b>-1.01</b> |              | <b>-0.45</b> | <b>-0.78</b> |              | -0.92        |
| <i>QBbr3f</i> | 3  | RM227 – RM85    | LOD    |              | 3.07         |              |              |              | 5.64         |
|               |    |                 | Effect | <b>0.74</b>  | 0.63         |              |              |              | 1.50         |
| <i>QBbr4a</i> | 4  | RM307–RG190     | LOD    |              |              |              |              |              |              |
|               |    |                 | Effect |              | <b>-0.64</b> |              | <b>-0.64</b> | <b>1.05</b>  | <b>-0.96</b> |
| <i>QBbr4b</i> | 4  | G271 – RM252    | LOD    |              |              |              | 2.26         |              |              |
|               |    |                 | Effect |              |              |              | 0.91         | <b>-1.51</b> |              |
| <i>QBbr4c</i> | 4  | RM317 – RM255   | LOD    |              |              |              |              |              |              |
|               |    |                 | Effect |              | <b>-0.54</b> | <b>-0.50</b> | <b>-0.58</b> |              |              |
| <i>QBbr4d</i> | 4  | RG143 – RD4.10  | LOD    | 4.24         | 3.18         | 3.71         |              |              | 4.49         |
|               |    |                 | Effect | -1.16        | -0.67        | -0.88        |              |              | -1.16        |
| <i>QBbr5b</i> | 5  | RM163 – RM161   | LOD    |              | 6.70         | 4.91         | 4.60         |              | 4.75         |
|               |    |                 | Effect | <b>1.00</b>  | 1.30         | 1.01         | 1.32         |              | 1.87         |
| <i>QBbr6a</i> | 6  | RD6.5 – RM3     | LOD    |              |              |              |              |              |              |
|               |    |                 | Effect | <b>0.94</b>  |              |              |              | <b>0.72</b>  |              |
| <i>QBbr7b</i> | 7  | RM234 – CDO405  | LOD    | 4.50         | 3.45         |              |              | 4.43         |              |
|               |    |                 | Effect | -1.25        | -0.72        | <b>-0.71</b> |              | -1.79        |              |
| <i>QBbr8b</i> | 8  | RM223 – RM210   | LOD    |              |              |              |              | 3.51         |              |
|               |    |                 | Effect |              | <b>0.40</b>  |              |              | 1.43         |              |
| <i>QBbr9a</i> |    |                 | LOD    | 2.56         |              |              |              |              | 2.05         |

| QRL            | Ch | Marker interval | Para.  | Race 1       | Race 2 | Race 3 | Race 4       | Race 5       | Race 6       |
|----------------|----|-----------------|--------|--------------|--------|--------|--------------|--------------|--------------|
|                |    |                 | Effect | -1.05        |        |        |              | <b>-0.69</b> | -1.22        |
| <i>QBbr9c</i>  | 9  | RM215 – RM205   | LOD    |              |        |        |              |              |              |
|                |    |                 | Effect | <b>-0.92</b> |        |        | <b>-0.98</b> | <b>-1.04</b> |              |
| <i>QBbr10</i>  | 10 | RM228 – RM333   | LOD    |              | 5.04   |        |              |              | 2.68         |
|                |    |                 | Effect |              | 0.77   |        |              |              | 1.13         |
| QBbr11b        |    | RZ781 – RM120   | LOD    |              |        |        |              |              |              |
|                |    |                 | Effect | <b>-0.92</b> |        |        |              | <b>-1.16</b> |              |
| <i>QBbr11c</i> | 11 | RM21 – RM206    | LOD    | 4.59         |        | 1.95   | 4.51         |              |              |
|                |    |                 | Effect | -1.20        |        | -0.60  | -1.25        | <b>-1.02</b> | <b>-0.59</b> |
| Xa4            | 11 | RM224 – RM123   | LOD    | 25.67        |        |        | 8.44         | 28.91        |              |
|                |    |                 | Effect | -4.80        |        |        | -2.07        | -4.62        |              |
| <i>Xa25(t)</i> | 12 | RM247 – OSR20   | LOD    |              | 6.38   | 3.10   | 4.86         | 12.01        | 13.21        |
|                |    |                 | Effect | <b>-2.71</b> | -1.45  | -0.70  | -1.37        | -3.64        | -2.30        |

The QRL effects were associated with the Teqing allele and the bold numbers are QRL main effects detected in the epistatic models (Table 4). Ch, chromosome; Para., parameters; LOD, logarithm of odds ratio.
