# Supplementary material
Source: PubMed Central journal article supplement (PMC1472418)
Supplement: pnas_0507492103_4.pdf [file pnas_0507492103_4.pdf]

**Table 4. Digenic epistatic quantitative resistance loci (QRL) pairs affecting lesion length caused by 10 Philippine *Xanthomonas oryzae* pv. *oryzae* (*Xoo*) races in the IR64/Azucena doubled haploid population**

| Ch | Marker <i>i</i> | Ch | Marker <i>j</i> | Para.     | Race 1 | Race 2 | Race 3 | Race 4 | Race 5 | Race 6 | Race 7 | Race 8 | Race 9 | Race 10 |
|----|-----------------|----|-----------------|-----------|--------|--------|--------|--------|--------|--------|--------|--------|--------|---------|
| 1  | <b>RG381</b>    | 6  | CDO544          | LOD       |        | 2.97   |        | 2.26   | 3.36   | 2.12   | 3.23   | 1.92   | 1.83   |         |
|    |                 |    |                 | $AA_{ij}$ |        | -0.92  |        | -0.88  | -1.33  | -1.02  | -1.49  | -1.85  | -0.74  |         |
| 1  | <b>RG381</b>    | 7  | <b>CDO418</b>   | LOD       |        | 2.08   | 2.43   |        |        |        |        |        | 2.29   |         |
|    |                 |    |                 | $AA_{ij}$ |        | 0.66   | 0.83   |        |        |        |        |        | 1.35   |         |
| 1  | RZ730           | 6  | RZ398           | LOD       | 2.47   | 1.97   | 2.82   |        | 4.44   |        | 3.42   | 2.54   |        |         |
|    |                 |    |                 | $AA_{ij}$ | -1.70  | -0.57  | -0.55  |        | -1.60  |        | -1.44  | -1.49  |        |         |
| 1  | <b>RZ276</b>    | 9  | <b>RZ422</b>    | LOD       |        | 5.59   | 2.74   |        |        |        |        |        | 3.19   | 2.62    |
|    |                 |    |                 | $AA_{ij}$ |        | 1.39   | 1.00   |        |        |        |        |        | 2.11   | 0.90    |
| 1  | <b>RZ276</b>    | 11 | <b>RZ536</b>    | LOD       | 3.18   | 2.91   | 1.97   | 1.98   | 4.37   |        | 2.97   | 2.50   | 3.72   | 3.57    |
|    |                 |    |                 | $AA_{ij}$ | -1.26  | 0.89   | 0.78   | 0.87   | 1.99   |        | 1.08   | 0.91   | 1.26   | 1.27    |
| 2  | <b>RG437</b>    | 2  | <b>RG256</b>    | LOD       | 3.70   | 1.84   | 3.00   | 1.75   | 4.46   |        | 5.35   | 4.20   |        | 3.18    |
|    |                 |    |                 | $AA_{ij}$ | -1.90  | -0.84  | -0.82  | -0.87  | -1.82  |        | -2.58  | -2.30  |        | -2.01   |
| 2  | <b>RG437</b>    | 4  | <b>RG190</b>    | LOD       |        |        |        | 2.30   |        |        | 2.33   | 1.84   |        | 3.95    |
|    |                 |    |                 | $AA_{ij}$ |        |        |        | -1.17  |        |        | -1.35  | -1.40  |        | -1.65   |
| 2  | <b>RG437</b>    | 6  | <i>Pgi2</i>     | LOD       |        |        | 2.07   |        | 2.23   |        | 4.09   | 2.54   |        | 2.64    |

| Ch | Marker <i>i</i>    | Ch | Marker <i>j</i> | Para.     | Race 1 | Race 2 | Race 3 | Race 4 | Race 5 | Race 6 | Race 7 | Race 8 | Race 9 | Race 10 |
|----|--------------------|----|-----------------|-----------|--------|--------|--------|--------|--------|--------|--------|--------|--------|---------|
|    |                    |    |                 | $AA_{ij}$ |        |        | 0.61   |        | -1.11  |        | -2.10  | -1.63  |        | -1.14   |
| 2  | <b><i>Pall</i></b> | 6  | RG162           | LOD       | 4.38   |        |        | 2.02   | 1.92   | 3.07   | 1.78   |        | 1.75   |         |
|    |                    |    |                 | $AA_{ij}$ | 1.88   |        |        | 1.13   | 1.13   | 0.95   | 1.48   |        | -1.06  |         |
| 2  | <b><i>Pall</i></b> | 8  | <b>RZ143</b>    | LOD       | 3.87   | 2.48   | 2.06   | 3.41   | 4.99   | 2.65   | 3.67   | 4.45   |        | 3.96    |
|    |                    |    |                 | $AA_{ij}$ | 1.63   | 0.96   | 0.70   | 1.40   | 2.36   | 1.35   | 1.86   | 2.49   |        | 1.33    |
| 2  | <b><i>Pall</i></b> | 9  | <b>RZ422</b>    | LOD       | 2.58   |        |        | 3.52   |        | 3.75   | 3.13   | 4.14   |        |         |
|    |                    |    |                 | $AA_{ij}$ | 0.87   |        |        | 1.64   |        | 1.69   | 1.89   | 2.66   |        |         |
| 2  | <b>RG256</b>       | 5  | <b>RG556</b>    | LOD       | 2.38   | 1.60   | 3.58   | 3.41   | 5.91   | 2.58   | 3.06   | 4.18   | 2.45   |         |
|    |                    |    |                 | $AA_{ij}$ | -1.56  | -0.54  | -0.65  | -1.03  | -1.87  | -1.86  | -1.38  | -2.42  | -0.93  |         |
| 2  | <b>RG256</b>       | 9  | <b>RZ422</b>    | LOD       | 1.75   |        | 1.81   | 2.14   | 3.20   |        | 2.54   | 3.07   |        | 1.76    |
|    |                    |    |                 | $AA_{ij}$ | 1.13   |        | 0.65   | 1.18   | 1.73   |        | 1.29   | 2.26   |        | 1.21    |
| 3  | <b><i>Pgil</i></b> | 4  | <b>RG190</b>    | LOD       | 1.73   |        | 4.01   | 1.76   | 2.22   |        |        |        | 6.32   |         |
|    |                    |    |                 | $AA_{ij}$ | 1.59   |        | -0.79  | -0.65  | 1.48   |        |        |        | -2.86  |         |
| 3  | <b><i>Pgil</i></b> | 4  | <b>RG143</b>    | LOD       |        |        |        | 2.07   | 1.93   |        | 2.89   | 3.00   | 1.74   |         |
|    |                    |    |                 | $AA_{ij}$ |        |        |        | -0.61  | -73    |        | -1.49  | -1.87  | 1.19   |         |
| 3  | <b><i>Pgil</i></b> | 8  | <i>Amp2</i>     | LOD       |        | 3.53   | 3.46   |        | 2.38   |        | 3.09   |        |        |         |
|    |                    |    |                 | $AA_{ij}$ |        | -0.65  | -0.58  |        | 1.24   |        | 1.79   |        |        |         |

| Ch | Marker <i>i</i> | Ch | Marker <i>j</i> | Para.     | Race 1 | Race 2 | Race 3 | Race 4 | Race 5 | Race 6 | Race 7 | Race 8 | Race 9 | Race 10 |
|----|-----------------|----|-----------------|-----------|--------|--------|--------|--------|--------|--------|--------|--------|--------|---------|
| 3  | <u>pRD10A</u>   | 4  | <b>RG163</b>    | LOD       | 2.83   |        | 4.09   | 2.27   | 5.13   |        |        |        |        |         |
|    |                 |    |                 | $AA_{ij}$ | -1.77  |        | -0.92  | -1.01  | -1.25  |        |        |        |        |         |
| 4  | <b>RG143</b>    | 5  | <b>CDO105</b>   | LOD       |        |        | 2.64   |        |        |        |        | 3.32   |        | 2.85    |
|    |                 |    |                 | $AA_{ij}$ |        |        | -0.64  |        |        |        |        | -0.92  |        | -0.82   |
| 4  | <b>RG163</b>    | 9  | <b>RG667</b>    | LOD       |        | 2.00   | 2.45   | 8.10   | 3.90   | 5.01   | 3.82   | 3.01   |        | 1.97    |
|    |                 |    |                 | $AA_{ij}$ |        | 0.63   | -0.74  | 1.35   | 0.72   | -2.20  | 0.87   | 1.06   |        | 1.33    |
| 4  | <b>RG190</b>    | 11 | <b>RZ536</b>    | LOD       | 2.20   | 2.30   |        | 2.21   | 1.94   | 2.86   | 1.81   | 2.12   |        | 4.01    |
|    |                 |    |                 | $AA_{ij}$ | 0.88   | 0.75   |        | 0.97   | 0.73   | 1.23   | 0.75   | 0.83   |        | 1.33    |
| 4  | <b>RG190</b>    | 12 | <b>RG341</b>    | LOD       |        | 3.67   | 1.82   | 4.36   | 5.09   | 5.95   | 3.00   | 3.03   |        |         |
|    |                 |    |                 | $AA_{ij}$ |        | 0.67   | 0.49   | 0.98   | 0.78   | 1.23   | 0.85   | 0.84   |        |         |
| 5  | <b>RZ70</b>     | 8  | <b>RZ143</b>    | LOD       | 4.23   | 3.42   |        | 2.72   | 3.17   | 2.05   | 1.89   | 1.87   |        |         |
|    |                 |    |                 | $AA_{ij}$ | -1.71  | -0.56  |        | -0.89  | -0.87  | -1.18  | -0.89  | -1.25  |        |         |
| 6  | <i>Amy2A</i>    | 8  | <b>RZ143</b>    | LOD       | 4.02   | 6.46   | 2.31   | 3.44   | 3.87   | 2.11   | 2.73   | 3.56   |        | 4.34    |
|    |                 |    |                 | $AA_{ij}$ | -1.30  | -1.47  | -0.75  | -0.72  | -1.13  | -0.68  | -0.89  | -1.43  |        | -1.00   |
| 7  | <b>RG511</b>    | 10 | <b>RZ500</b>    | LOD       |        |        |        | 2.07   | 1.82   | 2.61   | 1.91   |        | 2.82   | 2.24    |
|    |                 |    |                 | $AA_{ij}$ |        |        |        | -1.06  | -0.96  | -1.16  | -1.22  |        | -1.22  | -1.38   |
| 7  | <b>CDO418</b>   | 12 | <b>RG341</b>    | LOD       | 5.19   | 2.80   | 2.61   | 3.52   | 7.89   | 5.85   | 5.65   | 6.15   |        |         |

| Ch | Marker <i>i</i>    | Ch | Marker <i>j</i> | Para.     | Race 1 | Race 2 | Race 3 | Race 4 | Race 5 | Race 6 | Race 7 | Race 8 | Race 9 | Race 10 |
|----|--------------------|----|-----------------|-----------|--------|--------|--------|--------|--------|--------|--------|--------|--------|---------|
|    |                    |    |                 | $AA_{ij}$ | -2.08  | -0.79  | -0.80  | -1.18  | -1.16  | -1.24  | -1.76  | -2.45  |        |         |
| 8  | <b><i>Amp2</i></b> | 9  | RG757           | LOD       | 2.48   |        | 2.05   | 2.17   | 3.06   |        | 3.57   |        |        | 2.51    |
|    |                    |    |                 | $AA_{ij}$ | 1.33   |        | 0.75   | 1.07   | 1.28   |        | 1.63   |        |        | 0.95    |
| 8  | <b>TGMS1.2</b>     | 9  | <b>RG667</b>    | LOD       | 2.72   |        | 5.44   | 5.22   |        | 3.10   | 4.25   | 5.41   | 2.66   | 3.26    |
|    |                    |    |                 | $AA_{ij}$ | -1.69  |        | -0.97  | -0.89  |        | -1.60  | -2.12  | -2.95  | -0.73  | -1.52   |
| 10 | <b>RG241</b>       | 11 | <b>RZ536</b>    | LOD       | 24.74  | 1.86   |        | 12.21  |        | 1.74   | 22.67  | 18.54  | 1.74   | 12.84   |
|    |                    |    |                 | $AA_{ij}$ | 1.50   | 0.78   |        | 1.01   |        | 0.95   | 0.98   | 1.63   | 1.16   | 0.85    |
| 10 | <b>RZ500</b>       | 11 | <b>RZ536</b>    | LOD       | 20.69  |        |        | 10.97  |        | 4.20   | 2.21   | 16.72  |        | 16.41   |
|    |                    |    |                 | $AA_{ij}$ | 0.84   |        |        | 0.68   |        | 1.45   | 0.75   | 1.11   |        | 0.81    |

Bold markers are those flanking the detected QRL in Table 1. Underlined are markers flanking QRL detected in the recombinant inbred lines in Table

2. Ch, chromosome; Para., parameters; LOD, logarithm of odds ratio.
